# Supplementary material
Source: PubMed Central journal article supplement (PMC8370960)
Supplement: 40258_2021_659_MOESM1_ESM.pdf [file 40258_2021_659_MOESM1_ESM.pdf]

|                             |                                                                                                                                                                               |
|-----------------------------|-------------------------------------------------------------------------------------------------------------------------------------------------------------------------------|
| <b>Article title</b>        | A systematic review of the costs relating to non-pharmaceutical interventions against infectious disease outbreaks                                                            |
| <b>Journal name</b>         | Applied Health Economics and Health Policy                                                                                                                                    |
| <b>Authors</b>              | Janetta Skarp, Laura Downey, Julius Ohnberger, Lucia Cilloni, Alexandra Hogan, Abagael Sykes, Susannah Wang, Hiral Shah, Mimi Xiao, Katharina Hauck                           |
| <b>Affiliation</b>          | Imperial College London, MRC Centre for Global Infectious Disease Analysis, Abdul Latif Jameel Institute for Disease and Emergency Analytics (J-IDEA), London, United Kingdom |
| <b>Corresponding author</b> | <a href="mailto:janetta.skarp13@imperial.ac.uk">janetta.skarp13@imperial.ac.uk</a>                                                                                            |

## Supplementary information: Search strategy

### Search strings

(((isolation OR isolating OR confin\* OR quarantin\*) AND (infection\* OR infected OR infectious OR ill OR diseased))  
OR  
(contact tracing AND contact\*)  
OR  
((travel OR cruise OR flight OR train OR bus OR coach) AND (ban\* OR restrict\* OR limit\*))  
OR  
(curfew\* OR distancing OR ((gather\* OR mass OR group) AND (ban OR restrict OR curb\*))  
OR ((school OR creche OR daycare OR kindergarten OR pre-school OR nursery) AND  
(closing OR closure OR close)) OR ((work\* OR office OR firm OR factory) AND (non-  
attendance OR absenteeism OR closing OR closure OR close)) OR work\* from home)  
OR  
((screen\* OR scan\*) AND (point of entry OR point-of-entry OR entry OR exit))  
OR  
((face mask OR facemask OR n95 OR n99) OR (glove OR gloves) OR (saniti?er) OR  
(disinfect\* AND contaminat\* AND (surface\* OR door handle OR door knob OR area)) OR  
(hand-washing OR washing hands OR hand hygiene))  
OR  
(lockdown\* OR (quarantin\* AND (population OR community OR country OR nation OR state)  
AND (entire OR whole OR blanket OR everyone))))  
AND  
(cost\* OR pric\* OR econom\* OR financ\* OR ((econom\* OR soci\* OR financ\*) AND (los\* OR  
impact\* OR effect\* OR cost\* OR consequence\* OR burden\*))  
AND  
(outbreak\* OR epidemic\* or pandemic\*)

## Databases

- Medline
- EMBASE

## Restrictions

- Published on or after 1990
- Search term is in title, abstract or keyword
